# Supplementary material for: Humoral Responses to Diverse Autoimmune Disease-Associated Antigens in Multiple Sclerosis
Source: PubMed Central journal article supplement (PMC4466031; doi:10.1371/journal.pone.0129503), 2015-06-11
Supplement: pone.0129503.s001.pdf [file pone.0129503.s001.pdf]

# Supplementary Methods

## MRI Acquisition and Analysis

**Image Acquisition:** Patients underwent brain MRI on a 3-T General Electric Signa 4x/Lx, scanner. Axial dual fast spin-echo (FSE) T2/PD-weighted image (WI), 3D-spoiled-gradient recalled (SPGR) T1-WI, spin echo (SE) T1-WI with and without gadolinium (Gd) contrast, fast attenuated inversion recovery (FLAIR) scans were acquired.

**Image Analysis:** The MRI analysts were blinded to patients' clinical characteristics and clinical status. The following MRI measures were computed: T1-, T2- and gadolinium (Gd) contrast-enhancing (CE) lesion volumes (LV), measures of central, global and tissue specific brain atrophy.

**Lesion Measures:** T2- and T1-LVs were obtained with a semi-automated edge detection contouring-thresholding technique previously described [1].

**Global and Central Atrophy Measures:** The SIENAX cross-sectional software tool was used, with correction for T1-hypointensity misclassification, for brain extraction and tissue segmentation [2]. We acquired and used normalized volume measures of the whole brain (WBV), GM (GMV), white matter (WMV), and lateral ventricles (LVV), as described previously [3].

We used the T1-, T2-LV, whole brain WBV and GMV measures for statistical analyses.

## References

1. Zivadinov R, Rudick RA, De Masi R, Nasuelli D, Ukmar M, et al. (2001) Effects of IV methylprednisolone on brain atrophy in relapsing-remitting MS. *Neurology* 57: 1239-1247.

2. Smith SM, Zhang Y, Jenkinson M, Chen J, Matthews PM, et al. (2002) Accurate, robust, and automated longitudinal and cross-sectional brain change analysis. *Neuroimage* 17: 479-489.
3. Zivadinov R, Weinstock-Guttman B, Benedict R, Tamano-Blanco M, Hussein S, et al. (2007) Preservation of gray matter volume in multiple sclerosis patients with the Met allele of the rs6265 (Val66Met) SNP of brain-derived neurotrophic factor. *Hum Mol Genet* 16: 2659-2668.
