# Supplementary material for: Humoral Responses to Diverse Autoimmune Disease-Associated Antigens in Multiple Sclerosis
Source: PubMed Central journal article supplement (PMC4466031; doi:10.1371/journal.pone.0129503), 2015-06-11
Supplement: pone.0129503.s003.pdf [file pone.0129503.s003.pdf]

## Supplementary Table

**Supplementary Table 1.** Frequency of positivity for different combinations of KIR4.1 antibodies.

| Antigen                                                                 | HC                                            | RR-MS & CIS                             | SP-MS & RR/SP-MS                       | PP-MS & PR-MS                         | OND                          | <i>p</i> -value * |
|-------------------------------------------------------------------------|-----------------------------------------------|-----------------------------------------|----------------------------------------|---------------------------------------|------------------------------|-------------------|
| <b>Sample Size <i>n</i></b>                                             | <b>315</b>                                    | <b>411</b>                              | <b>128</b>                             | <b>33</b>                             | <b>82</b>                    | –                 |
| Any KIR4.1 (KIR4.1a IgG OR KIR4.1a IgM OR KIR4.1b IgG OR KIR4.1b IgM)   | 61 (19.4%)                                    | 61 (14.8%)                              | 18 (14.1%)                             | 3 (9.1%)                              | 14 (18.3%)                   | 0.31              |
| Total Positives (KIR4.1a IgG + KIR4.1a IgM + KIR4.1b IgG + KIR4.1b IgM) | 1 = 23 (7.3%)<br>2 = 36 (11%)<br>3 = 2 (0.6%) | 1 = 33 (8.0%)<br>2 = 28 (6.8%)<br>3 = 0 | 1 = 10 (7.8%)<br>2 = 8 (6.3%)<br>3 = 0 | 1 = 2 (6.1%)<br>2 = 1 (3.0%)<br>3 = 0 | 1 = 7 (8.5%)<br>2 = 8 (9.8%) | 0.45              |
| Any IgG (KIR4.1a IgG OR KIR4.1b IgG)                                    | 45 (14.3%)                                    | 39 (9.5%)                               | 16 (12.5%)                             | 3 (9.1%)                              | 12 (14.6%)                   | 0.30              |
| Any IgM (KIR4.1a IgM OR KIR4.1b IgM)                                    | 18 (5.7%)                                     | 22 (5.4%)                               | 2 (1.6%)                               | 0                                     | 3 (3.7%)                     | 0.21              |
